# Supplementary material for: Effect of irradiance on the emission of short-lived halocarbons from three common tropical marine microalgae
Source: PeerJ. 2019 Apr 19;7:e6758. doi: 10.7717/peerj.6758 (PMC6476285; doi:10.7717/peerj.6758)
Supplement: Table S5 [file peerj-07-6758-s005.xlsx]

## Sheet: Figure 1
		Statistical analysis of a) significance test and (b) homologous grouping using Factorial ANOVA according to post-hoc Tukey HSD Test for data shown in Figure 1
		(a) Tukey HSD test; variable Fv/Fm Approximate Probabilities for Post Hoc Tests_x000D_ Error: Between MS = .00002, df = 36.000 *Red indicates significant (p<0.01)
		Species	Light	Incubation	Synechococcus	Synechococcus	Synechococcus	Synechococcus	Synechococcus	Synechococcus	Chlorella	Chlorella	Chlorella	Chlorella	Chlorella	Chlorella	Amphora	Amphora	Amphora	Amphora	Amphora	Amphora
					Light 0	Light 0	Light 40	Light 40	Light 120	Light 120	Light 0	Light 0	Light 40	Light 40	Light 120	Light 120	Light 0	Light 0	Light 40	Light 40	Light 120	Light 120
					Before	After	Before	After	Before	After	Before	After	Before	After	Before	After	Before	After	Before	After	Before	After
		Synechococcus	Light 0	Before		0.000167494	0.97311	0.790736	1	0.000167494	0.000167494	0.000167494	0.000167494	0.000167494	0.000167494	0.000167494	0.000167494	0.000167494	0.000167494	0.000167494	0.000167494	0.000167494
		Synechococcus	Light 0	After	0.000167494		0.000167494	0.000167495	0.000167494	0.000167494	0.000167494	0.000167494	0.000167494	0.000167494	0.000167494	0.000167494	0.000167494	0.000167494	0.000167494	0.000167494	0.000167494	0.000167494
		Synechococcus	Light 40	Before	0.97311	0.000167494		1	0.97311	0.000167494	0.000167494	0.000167494	0.000167494	0.000167494	0.000167494	0.000167494	0.000167494	0.000167494	0.000167494	0.000167494	0.000167494	0.000167494
		Synechococcus	Light 40	After	0.790736	0.000167495	1		0.790736	0.000167494	0.000167494	0.000167494	0.000167494	0.000167494	0.000167494	0.000167494	0.000167494	0.000167494	0.000167494	0.000167494	0.000167494	0.000167494
		Synechococcus	Light 120	Before	1	0.000167494	0.97311	0.790736		0.000167494	0.000167494	0.000167494	0.000167494	0.000167494	0.000167494	0.000167494	0.000167494	0.000167494	0.000167494	0.000167494	0.000167494	0.000167494
		Synechococcus	Light 120	After	0.000167494	0.000167494	0.000167494	0.000167494	0.000167494		0.000167494	0.000167494	0.000167494	0.000167494	0.000167494	0.000167494	0.000167494	0.000167494	0.000167494	0.000167494	0.000167494	0.000167494
		Chlorella	Light 0	Before	0.000167494	0.000167494	0.000167494	0.000167494	0.000167494	0.000167494		0.000167494	0.000193047	0.000167494	1	0.000167494	0.000167494	0.000167494	0.000167494	0.000167494	0.000167494	0.000167494
		Chlorella	Light 0	After	0.000167494	0.000167494	0.000167494	0.000167494	0.000167494	0.000167494	0.000167494		0.157115	0.0240721	0.000167494	0.000167494	0.000167495	0.000167494	0.000167494	0.000167494	0.000167495	0.000167494
		Chlorella	Light 40	Before	0.000167494	0.000167494	0.000167494	0.000167494	0.000167494	0.000167494	0.000193047	0.157115		0.000168198	0.000193047	0.000167494	0.000167494	0.000167494	0.000167494	0.000167494	0.000167494	0.000167494
		Chlorella	Light 40	After	0.000167494	0.000167494	0.000167494	0.000167494	0.000167494	0.000167494	0.000167494	0.0240721	0.000168198		0.000167494	0.000167494	0.00244816	0.000167494	0.000814333	0.000167494	0.00244816	0.000167494
		Chlorella	Light 120	Before	0.000167494	0.000167494	0.000167494	0.000167494	0.000167494	0.000167494	1	0.000167494	0.000193047	0.000167494		0.000167494	0.000167494	0.000167494	0.000167494	0.000167494	0.000167494	0.000167494
		Chlorella	Light 120	After	0.000167494	0.000167494	0.000167494	0.000167494	0.000167494	0.000167494	0.000167494	0.000167494	0.000167494	0.000167494	0.000167494		0.000167494	0.000167494	0.000167494	0.000167494	0.000167494	0.000167494
		Amphora	Light 0	Before	0.000167494	0.000167494	0.000167494	0.000167494	0.000167494	0.000167494	0.000167494	0.000167495	0.000167494	0.00244816	0.000167494	0.000167494		0.00688282	1	0.000167494	1	0.000167494
		Amphora	Light 0	After	0.000167494	0.000167494	0.000167494	0.000167494	0.000167494	0.000167494	0.000167494	0.000167494	0.000167494	0.000167494	0.000167494	0.000167494	0.00688282		0.0213099	0.000167494	0.00688282	0.000167494
		Amphora	Light 40	Before	0.000167494	0.000167494	0.000167494	0.000167494	0.000167494	0.000167494	0.000167494	0.000167494	0.000167494	0.000814333	0.000167494	0.000167494	1	0.0213099		0.000167494	1	0.000167494
		Amphora	Light 40	After	0.000167494	0.000167494	0.000167494	0.000167494	0.000167494	0.000167494	0.000167494	0.000167494	0.000167494	0.000167494	0.000167494	0.000167494	0.000167494	0.000167494	0.000167494		0.000167494	0.000167494
		Amphora	Light 120	Before	0.000167494	0.000167494	0.000167494	0.000167494	0.000167494	0.000167494	0.000167494	0.000167495	0.000167494	0.00244816	0.000167494	0.000167494	1	0.00688282	1	0.000167494		0.000167494
		Amphora	Light 120	After	0.000167494	0.000167494	0.000167494	0.000167494	0.000167494	0.000167494	0.000167494	0.000167494	0.000167494	0.000167494	0.000167494	0.000167494	0.000167494	0.000167494	0.000167494	0.000167494	0.000167494
		(b) Tukey HSD test; variable Fv/Fm Homogenous Groups, alpha = .01000 (Non-Exhaustive Search)_x000D_ Error: Between MS = .00002, df = 36.000
		Species	Light	Incubation		1	2	3	4	5	6	7	8	9	10	11
		Synechococcus	Light 120	After	0.262	****
		Synechococcus	Light 120	Before	0.313833		****
		Synechococcus	Light 0	Before	0.313833		****
		Synechococcus	Light 40	Before	0.3195		****
		Synechococcus	Light 40	After	0.321333		****
		Synechococcus	Light 0	After	0.3535			****
		Amphora	Light 120	After	0.435				****
		Chlorella	Light 120	After	0.509833					****
		Amphora	Light 40	After	0.544167						****
		Amphora	Light 0	After	0.5935							****
		Amphora	Light 40	Before	0.608							****	****
		Amphora	Light 120	Before	0.6095								****
		Amphora	Light 0	Before	0.6095								****
		Chlorella	Light 40	After	0.626833									****
		Chlorella	Light 0	After	0.641167									****	****
		Chlorella	Light 40	Before	0.652667										****
		Chlorella	Light 0	Before	0.675											****
		Chlorella	Light 120	Before	0.675											****

## Sheet: Figure 2
		Statistical analysis of significance test using Factorial ANOVA according to post-hoc Tukey HSD Test for data shown in Figure 2
		Tukey HSD test; variable Emission rate_chl a Approximate Probabilities for Post Hoc Tests_x000D_ Error: Between MSE = .00002, df = 90.000 *Red indicates significant (p<0.05) differences
		Species	Light level	Compound	Synechococcus	Synechococcus	Synechococcus	Synechococcus	Synechococcus	Synechococcus	Synechococcus	Synechococcus	Synechococcus	Synechococcus	Synechococcus	Synechococcus	Synechococcus	Synechococcus	Synechococcus	Chlorella	Chlorella	Chlorella	Chlorella	Chlorella	Chlorella	Chlorella	Chlorella	Chlorella	Chlorella	Chlorella	Chlorella	Chlorella	Chlorella	Chlorella	Amphora	Amphora	Amphora	Amphora	Amphora	Amphora	Amphora	Amphora	Amphora	Amphora	Amphora	Amphora	Amphora	Amphora	Amphora
					Light 0	Light 0	Light 0	Light 0	Light 0	Light 40	Light 40	Light 40	Light 40	Light 40	Light 120	Light 120	Light 120	Light 120	Light 120	Light 0	Light 0	Light 0	Light 0	Light 0	Light 40	Light 40	Light 40	Light 40	Light 40	Light 120	Light 120	Light 120	Light 120	Light 120	Light 0	Light 0	Light 0	Light 0	Light 0	Light 40	Light 40	Light 40	Light 40	Light 40	Light 120	Light 120	Light 120	Light 120	Light 120
					CHBr3	CH3I	CHCl3	CHBr2Cl	CH2Br2	CHBr3	CH3I	CHCl3	CHBr2Cl	CH2Br2	CHBr3	CH3I	CHCl3	CHBr2Cl	CH2Br2	CHBr3	CH3I	CHCl3	CHBr2Cl	CH2Br2	CHBr3	CH3I	CHCl3	CHBr2Cl	CH2Br2	CHBr3	CH3I	CHCl3	CHBr2Cl	CH2Br2	CHBr3	CH3I	CHCl3	CHBr2Cl	CH2Br2	CHBr3	CH3I	CHCl3	CHBr2Cl	CH2Br2	CHBr3	CH3I	CHCl3	CHBr2Cl	CH2Br2
		Synechococcus	Light 0	CHBr3		0.000160397	1	1	0.380357	0.00539231	0.808828	0.000160397	1	0.257807	1	0.000160832	1	1	0.903038	1	0.000160397	1	1	1	0.000160397	0.00676512	0.000160397	1	0.000160397	1	1	1	1	0.999998	1	0.000160397	1	1	1	1	1	1	1	1	1	0.00155562	1	1	1
		Synechococcus	Light 0	CH3I	0.000160397		0.000160397	0.000160397	0.000160924	0.000160397	0.000160417	0.985049	0.000160397	0.000160397	0.000160397	0.405616	0.000160397	0.000160397	0.000160404	0.000160397	1	0.000160397	0.000160397	0.000160397	0.000160397	0.000160397	0.000160397	0.000160397	0.000160397	0.000160397	0.000160397	0.000160397	0.000160397	0.000160397	0.000160397	0.984488	0.000160397	0.000160397	0.000160397	0.000160397	0.000160397	0.000160397	0.000160397	0.000160397	0.000160397	0.00276248	0.000160397	0.000160397	0.000160397
		Synechococcus	Light 0	CHCl3	1	0.000160397		1	0.982353	0.000218415	0.999959	0.000160397	1	0.0115353	1	0.000253648	1	1	0.999998	1	0.0001604	1	1	1	0.000160397	0.000237942	0.000160397	1	0.000160397	1	0.99997	1	1	1	1	0.000160397	1	1	1	0.999984	1	1	1	1	1	0.0608504	1	1	1
		Synechococcus	Light 0	CHBr2Cl	1	0.000160397	1		0.463026	0.00359559	0.871299	0.000160397	1	0.199779	1	0.000161193	1	1	0.942609	1	0.000160397	1	1	1	0.000160397	0.00450904	0.000160397	1	0.000160397	1	1	1	1	1	1	0.000160397	1	1	1	1	1	1	1	1	1	0.00234893	1	1	1
		Synechococcus	Light 0	CH2Br2	0.380357	0.000160924	0.982353	0.463026		0.000160397	1	0.000160397	0.477172	0.000161077	0.380357	0.214016	0.926065	0.473047	1	0.386823	0.000433127	0.82968	0.478766	0.308544	0.000160397	0.000160398	0.000160397	0.331294	0.000160397	0.426685	0.121815	0.710755	0.459974	0.999066	0.446288	0.000160397	0.957151	0.463398	0.573937	0.135661	0.941489	0.990873	0.460474	0.459965	0.409663	0.999209	0.393741	0.450095	0.562915
		Synechococcus	Light 40	CHBr3	0.00539231	0.000160397	0.000218415	0.00359559	0.000160397		0.00016041	0.000160397	0.00336274	1	0.00539231	0.000160397	0.00034322	0.00342881	0.000160433	0.00521802	0.000160397	0.000612642	0.00333758	0.00792578	0.000160397	1	0.000160397	0.00700022	0.227928	0.00427845	0.0300971	0.00112743	0.00364486	0.000171922	0.00389122	0.000160397	0.000273326	0.00358923	0.00214599	0.0263542	0.000307847	0.000198235	0.00363621	0.00364503	0.00465459	0.000160397	0.00503915	0.00382082	0.00225673
		Synechococcus	Light 40	CH3I	0.808828	0.000160417	0.999959	0.871299	1	0.00016041		0.000160397	0.880275	0.000173628	0.808828	0.0444652	0.998951	0.877706	1	0.814434	0.000179328	0.992653	0.88126	0.737598	0.000160397	0.000160415	0.000160397	0.762024	0.000160397	0.846176	0.435184	0.973697	0.869427	1	0.860204	0.000160397	0.999698	0.871541	0.930255	0.466389	0.999389	0.99999	0.869755	0.869421	0.833169	0.934674	0.820267	0.862818	0.92548
		Synechococcus	Light 40	CHCl3	0.000160397	0.985049	0.000160397	0.000160397	0.000160397	0.000160397	0.000160397		0.000160397	0.000160397	0.000160397	0.000572154	0.000160397	0.000160397	0.000160397	0.000160397	0.264743	0.000160397	0.000160397	0.000160397	0.000160397	0.000160397	0.000160397	0.000160397	0.000160397	0.000160397	0.000160397	0.000160397	0.000160397	0.000160397	0.000160397	1	0.000160397	0.000160397	0.000160397	0.000160397	0.000160397	0.000160397	0.000160397	0.000160397	0.000160397	0.000160483	0.000160397	0.000160397	0.000160397
		Synechococcus	Light 40	CHBr2Cl	1	0.000160397	1	1	0.477172	0.00336274	0.880275	0.000160397		0.191071	1	0.000161276	1	1	0.947829	1	0.000160397	1	1	1	0.000160397	0.00421471	0.000160397	1	0.000160397	1	1	1	1	1	1	0.000160397	1	1	1	1	1	1	1	1	1	0.00251138	1	1	1
		Synechococcus	Light 40	CH2Br2	0.257807	0.000160397	0.0115353	0.199779	0.000161077	1	0.000173628	0.000160397	0.191071		0.257807	0.000160397	0.0268112	0.193542	0.000192327	0.252689	0.000160397	0.0514576	0.190124	0.322907	0.000160397	1	0.000160397	0.30048	0.0044195	0.223404	0.616892	0.086931	0.201561	0.00346903	0.210279	0.000160397	0.0188471	0.199548	0.140493	0.584615	0.0229214	0.0083904	0.20125	0.201567	0.235459	0.000160397	0.247338	0.207818	0.145619
		Synechococcus	Light 120	CHBr3	1	0.000160397	1	1	0.380357	0.00539231	0.808828	0.000160397	1	0.257807		0.000160832	1	1	0.903038	1	0.000160397	1	1	1	0.000160397	0.00676512	0.000160397	1	0.000160397	1	1	1	1	0.999998	1	0.000160397	1	1	1	1	1	1	1	1	1	0.00155562	1	1	1
		Synechococcus	Light 120	CH3I	0.000160832	0.405616	0.000253648	0.000161193	0.214016	0.000160397	0.0444652	0.000572154	0.000161276	0.000160397	0.000160832		0.000189087	0.000161251	0.0249285	0.000160854	0.997471	0.000170843	0.000161286	0.000160639	0.000160397	0.000160397	0.000160397	0.00016069	0.000160397	0.000161012	0.000160423	0.000164636	0.000161178	0.0005757	0.000161105	0.000562958	0.000208066	0.000161196	0.000162088	0.00016043	0.000196471	0.000301318	0.00016118	0.000161178	0.00016094	0.99982	0.000160879	0.000161125	0.000161969
		Synechococcus	Light 120	CHCl3	1	0.000160397	1	1	0.926065	0.00034322	0.998951	0.000160397	1	0.0268112	1	0.000189087		1	0.999887	1	0.000160398	1	1	1	0.000160397	0.000401532	0.000160397	1	0.000160397	1	1	1	1	1	1	0.000160397	1	1	1	1	1	1	1	1	1	0.027865	1	1	1
		Synechococcus	Light 120	CHBr2Cl	1	0.000160397	1	1	0.473047	0.00342881	0.877706	0.000160397	1	0.193542	1	0.000161251	1		0.946348	1	0.000160397	1	1	1	0.000160397	0.00429742	0.000160397	1	0.000160397	1	1	1	1	1	1	0.000160397	1	1	1	1	1	1	1	1	1	0.00246301	1	1	1
		Synechococcus	Light 120	CH2Br2	0.903038	0.000160404	0.999998	0.942609	1	0.000160433	1	0.000160397	0.947829	0.000192327	0.903038	0.0249285	0.999887	0.946348		0.906794	0.00016812	0.998619	0.948393	0.851844	0.000160397	0.000160449	0.000160397	0.870064	0.000160397	0.927347	0.576182	0.992793	0.941505	1	0.935984	0.000160397	0.999977	0.942752	0.974333	0.608508	0.999943	1	0.941699	0.941501	0.919092	0.858046	0.910671	0.93756	0.972012
		Chlorella	Light 0	CHBr3	1	0.000160397	1	1	0.386823	0.00521802	0.814434	0.000160397	1	0.252689	1	0.000160854	1	1	0.906794		0.000160397	1	1	1	0.000160397	0.00654941	0.000160397	1	0.000160397	1	1	1	1	0.999999	1	0.000160397	1	1	1	1	1	1	1	1	1	0.00160763	1	1	1
		Chlorella	Light 0	CH3I	0.000160397	1	0.0001604	0.000160397	0.000433127	0.000160397	0.000179328	0.264743	0.000160397	0.000160397	0.000160397	0.997471	0.000160398	0.000160397	0.00016812	0.000160397		0.000160397	0.000160397	0.000160397	0.000160397	0.000160397	0.000160397	0.000160397	0.000160397	0.000160397	0.000160397	0.000160397	0.000160397	0.00016042	0.000160397	0.261745	0.000160398	0.000160397	0.000160397	0.000160397	0.000160398	0.000160402	0.000160397	0.000160397	0.000160397	0.163429	0.000160397	0.000160397	0.000160397
		Chlorella	Light 0	CHCl3	1	0.000160397	1	1	0.82968	0.000612642	0.992653	0.000160397	1	0.0514576	1	0.000170843	1	1	0.998619	1	0.000160397		1	1	0.000160397	0.000754492	0.000160397	1	0.000160397	1	1	1	1	1	1	0.000160397	1	1	1	1	1	1	1	1	1	0.0139843	1	1	1
		Chlorella	Light 0	CHBr2Cl	1	0.000160397	1	1	0.478766	0.00333758	0.88126	0.000160397	1	0.190124	1	0.000161286	1	1	0.948393	1	0.000160397	1		1	0.000160397	0.0041832	0.000160397	1	0.000160397	1	1	1	1	1	1	0.000160397	1	1	1	1	1	1	1	1	1	0.00253031	1	1	1
		Chlorella	Light 0	CH2Br2	1	0.000160397	1	1	0.308544	0.00792578	0.737598	0.000160397	1	0.322907	1	0.000160639	1	1	0.851844	1	0.000160397	1	1		0.000160397	0.00988992	0.000160397	1	0.000160397	1	1	1	1	0.999988	1	0.000160397	1	1	1	1	1	1	1	1	1	0.00106453	1	1	1
		Chlorella	Light 40	CHBr3	0.000160397	0.000160397	0.000160397	0.000160397	0.000160397	0.000160397	0.000160397	0.000160397	0.000160397	0.000160397	0.000160397	0.000160397	0.000160397	0.000160397	0.000160397	0.000160397	0.000160397	0.000160397	0.000160397	0.000160397		0.000160397	0.99999	0.000160397	0.000160397	0.000160397	0.000160397	0.000160397	0.000160397	0.000160397	0.000160397	0.000160397	0.000160397	0.000160397	0.000160397	0.000160397	0.000160397	0.000160397	0.000160397	0.000160397	0.000160397	0.000160397	0.000160397	0.000160397	0.000160397
		Chlorella	Light 40	CH3I	0.00676512	0.000160397	0.000237942	0.00450904	0.000160398	1	0.000160415	0.000160397	0.00421471	1	0.00676512	0.000160397	0.000401532	0.00429742	0.000160449	0.00654941	0.000160397	0.000754492	0.0041832	0.00988992	0.000160397		0.000160397	0.00872579	0.197168	0.0053612	0.0367107	0.00140562	0.00457062	0.000176064	0.0048783	0.000160397	0.0003102	0.00450109	0.00268877	0.0322267	0.00035538	0.000211205	0.00455981	0.00457083	0.00582849	0.000160397	0.00632791	0.00479042	0.00283416
		Chlorella	Light 40	CHCl3	0.000160397	0.000160397	0.000160397	0.000160397	0.000160397	0.000160397	0.000160397	0.000160397	0.000160397	0.000160397	0.000160397	0.000160397	0.000160397	0.000160397	0.000160397	0.000160397	0.000160397	0.000160397	0.000160397	0.000160397	0.99999	0.000160397		0.000160397	0.000160397	0.000160397	0.000160397	0.000160397	0.000160397	0.000160397	0.000160397	0.000160397	0.000160397	0.000160397	0.000160397	0.000160397	0.000160397	0.000160397	0.000160397	0.000160397	0.000160397	0.000160397	0.000160397	0.000160397	0.000160397
		Chlorella	Light 40	CHBr2Cl	1	0.000160397	1	1	0.331294	0.00700022	0.762024	0.000160397	1	0.30048	1	0.00016069	1	1	0.870064	1	0.000160397	1	1	1	0.000160397	0.00872579	0.000160397		0.000160397	1	1	1	1	0.999994	1	0.000160397	1	1	1	1	1	1	1	1	1	0.00120365	1	1	1
		Chlorella	Light 40	CH2Br2	0.000160397	0.000160397	0.000160397	0.000160397	0.000160397	0.227928	0.000160397	0.000160397	0.000160397	0.0044195	0.000160397	0.000160397	0.000160397	0.000160397	0.000160397	0.000160397	0.000160397	0.000160397	0.000160397	0.000160397	0.000160397	0.197168	0.000160397	0.000160397		0.000160397	0.000160399	0.000160397	0.000160397	0.000160397	0.000160397	0.000160397	0.000160397	0.000160397	0.000160397	0.000160398	0.000160397	0.000160397	0.000160397	0.000160397	0.000160397	0.000160397	0.000160397	0.000160397	0.000160397
		Chlorella	Light 120	CHBr3	1	0.000160397	1	1	0.426685	0.00427845	0.846176	0.000160397	1	0.223404	1	0.000161012	1	1	0.927347	1	0.000160397	1	1	1	0.000160397	0.0053612	0.000160397	1	0.000160397		1	1	1	1	1	0.000160397	1	1	1	1	1	1	1	1	1	0.00197112	1	1	1
		Chlorella	Light 120	CH3I	1	0.000160397	0.99997	1	0.121815	0.0300971	0.435184	0.000160397	1	0.616892	1	0.000160423	1	1	0.576182	1	0.000160397	1	1	1	0.000160397	0.0367107	0.000160397	1	0.000160399	1		1	1	0.997966	1	0.000160397	0.999998	1	1	1	0.999999	0.999887	1	1	1	0.000324711	1	1	1
		Chlorella	Light 120	CHCl3	1	0.000160397	1	1	0.710755	0.00112743	0.973697	0.000160397	1	0.086931	1	0.000164636	1	1	0.992793	1	0.000160397	1	1	1	0.000160397	0.00140562	0.000160397	1	0.000160397	1	1		1	1	1	0.000160397	1	1	1	1	1	1	1	1	1	0.00747771	1	1	1
		Chlorella	Light 120	CHBr2Cl	1	0.000160397	1	1	0.459974	0.00364486	0.869427	0.000160397	1	0.201561	1	0.000161178	1	1	0.941505	1	0.000160397	1	1	1	0.000160397	0.00457062	0.000160397	1	0.000160397	1	1	1		1	1	0.000160397	1	1	1	1	1	1	1	1	1	0.00231726	1	1	1
		Chlorella	Light 120	CH2Br2	0.999998	0.000160397	1	1	0.999066	0.000171922	1	0.000160397	1	0.00346903	0.999998	0.0005757	1	1	1	0.999999	0.00016042	1	1	0.999988	0.000160397	0.000176064	0.000160397	0.999994	0.000160397	1	0.997966	1	1		1	0.000160397	1	1	1	0.998659	1	1	1	1	0.999999	0.153603	0.999999	1	1
		Amphora	Light 0	CHBr3	1	0.000160397	1	1	0.446288	0.00389122	0.860204	0.000160397	1	0.210279	1	0.000161105	1	1	0.935984	1	0.000160397	1	1	1	0.000160397	0.0048783	0.000160397	1	0.000160397	1	1	1	1	1		0.000160397	1	1	1	1	1	1	1	1	1	0.0021711	1	1	1
		Amphora	Light 0	CH3I	0.000160397	0.984488	0.000160397	0.000160397	0.000160397	0.000160397	0.000160397	1	0.000160397	0.000160397	0.000160397	0.000562958	0.000160397	0.000160397	0.000160397	0.000160397	0.261745	0.000160397	0.000160397	0.000160397	0.000160397	0.000160397	0.000160397	0.000160397	0.000160397	0.000160397	0.000160397	0.000160397	0.000160397	0.000160397	0.000160397		0.000160397	0.000160397	0.000160397	0.000160397	0.000160397	0.000160397	0.000160397	0.000160397	0.000160397	0.00016048	0.000160397	0.000160397	0.000160397
		Amphora	Light 0	CHCl3	1	0.000160397	1	1	0.957151	0.000273326	0.999698	0.000160397	1	0.0188471	1	0.000208066	1	1	0.999977	1	0.000160398	1	1	1	0.000160397	0.0003102	0.000160397	1	0.000160397	1	0.999998	1	1	1	1	0.000160397		1	1	0.999999	1	1	1	1	1	0.0391593	1	1	1
		Amphora	Light 0	CHBr2Cl	1	0.000160397	1	1	0.463398	0.00358923	0.871541	0.000160397	1	0.199548	1	0.000161196	1	1	0.942752	1	0.000160397	1	1	1	0.000160397	0.00450109	0.000160397	1	0.000160397	1	1	1	1	1	1	0.000160397	1		1	1	1	1	1	1	1	0.00235309	1	1	1
		Amphora	Light 0	CH2Br2	1	0.000160397	1	1	0.573937	0.00214599	0.930255	0.000160397	1	0.140493	1	0.000162088	1	1	0.974333	1	0.000160397	1	1	1	0.000160397	0.00268877	0.000160397	1	0.000160397	1	1	1	1	1	1	0.000160397	1	1		1	1	1	1	1	1	0.00393698	1	1	1
		Amphora	Light 40	CHBr3	1	0.000160397	0.999984	1	0.135661	0.0263542	0.466389	0.000160397	1	0.584615	1	0.00016043	1	1	0.608508	1	0.000160397	1	1	1	0.000160397	0.0322267	0.000160397	1	0.000160398	1	1	1	1	0.998659	1	0.000160397	0.999999	1	1		1	0.999937	1	1	1	0.00035777	1	1	1
		Amphora	Light 40	CH3I	1	0.000160397	1	1	0.941489	0.000307847	0.999389	0.000160397	1	0.0229214	1	0.000196471	1	1	0.999943	1	0.000160398	1	1	1	0.000160397	0.00035538	0.000160397	1	0.000160397	1	0.999999	1	1	1	1	0.000160397	1	1	1	1		1	1	1	1	0.0325094	1	1	1
		Amphora	Light 40	CHCl3	1	0.000160397	1	1	0.990873	0.000198235	0.99999	0.000160397	1	0.0083904	1	0.000301318	1	1	1	1	0.000160402	1	1	1	0.000160397	0.000211205	0.000160397	1	0.000160397	1	0.999887	1	1	1	1	0.000160397	1	1	1	0.999937	1		1	1	1	0.0792583	1	1	1
		Amphora	Light 40	CHBr2Cl	1	0.000160397	1	1	0.460474	0.00363621	0.869755	0.000160397	1	0.20125	1	0.00016118	1	1	0.941699	1	0.000160397	1	1	1	0.000160397	0.00455981	0.000160397	1	0.000160397	1	1	1	1	1	1	0.000160397	1	1	1	1	1	1		1	1	0.00232276	1	1	1
		Amphora	Light 40	CH2Br2	1	0.000160397	1	1	0.459965	0.00364503	0.869421	0.000160397	1	0.201567	1	0.000161178	1	1	0.941501	1	0.000160397	1	1	1	0.000160397	0.00457083	0.000160397	1	0.000160397	1	1	1	1	1	1	0.000160397	1	1	1	1	1	1	1		1	0.00231716	1	1	1
		Amphora	Light 120	CHBr3	1	0.000160397	1	1	0.409663	0.00465459	0.833169	0.000160397	1	0.235459	1	0.00016094	1	1	0.919092	1	0.000160397	1	1	1	0.000160397	0.00582849	0.000160397	1	0.000160397	1	1	1	1	0.999999	1	0.000160397	1	1	1	1	1	1	1	1		0.00180289	1	1	1
		Amphora	Light 120	CH3I	0.00155562	0.00276248	0.0608504	0.00234893	0.999209	0.000160397	0.934674	0.000160483	0.00251138	0.000160397	0.00155562	0.99982	0.027865	0.00246301	0.858046	0.00160763	0.163429	0.0139843	0.00253031	0.00106453	0.000160397	0.000160397	0.000160397	0.00120365	0.000160397	0.00197112	0.000324711	0.00747771	0.00231726	0.153603	0.0021711	0.00016048	0.0391593	0.00235309	0.00393698	0.00035777	0.0325094	0.0792583	0.00232276	0.00231716	0.00180289		0.00166482	0.00221091	0.00374294
		Amphora	Light 120	CHCl3	1	0.000160397	1	1	0.393741	0.00503915	0.820267	0.000160397	1	0.247338	1	0.000160879	1	1	0.910671	1	0.000160397	1	1	1	0.000160397	0.00632791	0.000160397	1	0.000160397	1	1	1	1	0.999999	1	0.000160397	1	1	1	1	1	1	1	1	1	0.00166482		1	1
		Amphora	Light 120	CHBr2Cl	1	0.000160397	1	1	0.450095	0.00382082	0.862818	0.000160397	1	0.207818	1	0.000161125	1	1	0.93756	1	0.000160397	1	1	1	0.000160397	0.00479042	0.000160397	1	0.000160397	1	1	1	1	1	1	0.000160397	1	1	1	1	1	1	1	1	1	0.00221091	1		1
		Amphora	Light 120	CH2Br2	1	0.000160397	1	1	0.562915	0.00225673	0.92548	0.000160397	1	0.145619	1	0.000161969	1	1	0.972012	1	0.000160397	1	1	1	0.000160397	0.00283416	0.000160397	1	0.000160397	1	1	1	1	1	1	0.000160397	1	1	1	1	1	1	1	1	1	0.00374294	1	1

## Sheet: Figure S2 
	Statistical analysis of a) significance test and (b) homologous grouping using Factorial ANOVA according to post-hoc Tukey HSD Test for data shown in Figure S2
	(a) Tukey HSD test; variable mg/L Approximate Probabilities for Post Hoc Tests_x000D_ Error: Between MS = .00202, df = 18.000 *Red indicates significant p<0.01)
	Species	Light level	Synechococcus	Synechococcus	Synechococcus	Chlorella	Chlorella	Chlorella	Amphora	Amphora	Amphora
			light 0	light 40	light 120	light 0	light 40	light 120	light 0	light 40	light 120
	Synechococcus	light 0		0.000173368	0.000815223	0.284752	0.000173368	0.55132	0.99992	0.000183633	0.000173368
	Synechococcus	light 40	0.000173368		0.000173368	0.000173368	0.653169	0.000173368	0.000173368	0.000173368	0.00108967
	Synechococcus	light 120	0.000815223	0.000173368		0.111836	0.000173368	0.0429643	0.00186299	0.647738	0.000173368
	Chlorella	light 0	0.284752	0.000173368	0.111836		0.000173368	0.999832	0.523019	0.00279383	0.000173368
	Chlorella	light 40	0.000173368	0.653169	0.000173368	0.000173368		0.000173368	0.000173368	0.000173368	0.042972
	Chlorella	light 120	0.55132	0.000173368	0.0429643	0.999832	0.000173368		0.81261	0.00107212	0.000173368
	Amphora	light 0	0.99992	0.000173368	0.00186299	0.523019	0.000173368	0.81261		0.000214082	0.000173368
	Amphora	light 40	0.000183633	0.000173368	0.647738	0.00279383	0.000173368	0.00107212	0.000214082		0.000173373
	Amphora	light 120	0.000173368	0.00108967	0.000173368	0.000173368	0.042972	0.000173368	0.000173368	0.000173373
	(b) Tukey HSD test; variable mg/L Homogenous Groups, alpha = .01000_x000D_ Error: Between MS = .00202, df = 18.000
	Species	Light level	Mean	e	d	c	b	a
	Synechococcus	light 0	0.100847	****
	Amphora	light 0	0.11759	****
	Chlorella	light 120	0.17492	****	****
	Chlorella	light 0	0.193407	****	****
	Synechococcus	light 120	0.306433		****	****
	Amphora	light 40	0.37463			****
	Amphora	light 120	0.757133				****
	Chlorella	light 40	0.888643				****	****
	Synechococcus	light 40	0.956507					****

## Sheet: Figure S4
	Statistical analysis of a) significance test and (b) homologous grouping using Factorial ANOVA according to post-hoc Tukey HSD Test for data shown in Figure S4
		(a) Tukey HSD test; variable cell/ml_x000D_ Approximate Probabilities for Post Hoc Tests_x000D_ Error: Between MS = 6985E6, df = 18.000 *Red indicates significant (p<0.01)
		Species	Light level	Synechococcus	Synechococcus	Synechococcus	Parachlorella	Parachlorella	Parachlorella	Amphora	Amphora	Amphora
				light 0	light 40	light 120	light 0	light 40	light 120	light 0	light 40	light 120
		Synechococcus	light 0		0.000173368	0.000173368	0.000173368	0.000173368	0.000173368	0.000173368	0.000173368	0.000173368
		Synechococcus	light 40	0.000173368		0.000173368	0.0136406	0.000173368	0.000173368	0.000282883	1	0.000416516
		Synechococcus	light 120	0.000173368	0.000173368		0.000173368	1	0.000173368	0.000173368	0.000173368	0.000173368
		Parachlorella	light 0	0.000173368	0.0136406	0.000173368		0.000173368	0.000173368	0.392862	0.0202987	0.619123
		Parachlorella	light 40	0.000173368	0.000173368	1	0.000173368		0.000173368	0.000173368	0.000173368	0.000173368
		Parachlorella	light 120	0.000173368	0.000173368	0.000173368	0.000173368	0.000173368		0.000173368	0.000173368	0.000173368
		Amphora	light 0	0.000173368	0.000282883	0.000173368	0.392862	0.000173368	0.000173368		0.00033568	0.999975
		Amphora	light 40	0.000173368	1	0.000173368	0.0202987	0.000173368	0.000173368	0.00033568		0.000539797
		Amphora	light 120	0.000173368	0.000416516	0.000173368	0.619123	0.000173368	0.000173368	0.999975	0.000539797
		(b) Tukey HSD test; variable cell/ml Homogenous Groups, alpha = .01000_x000D_ Error: Between MS = 6985E6, df = 18.000
		Species	Light level	Mean	e	d	c	b	a
		Amphora	light 0	40000	****
		Amphora	light 120	66666.7	****
		Chlorella	light 0	196667	****	****
		Amphora	light 40	466667		****
		Synechococcus	light 40	480000		****
		Chlorella	light 40	1260000			****
		Synechococcus	light 120	1.26667e+06			****
		Synechococcus	light 0	2200000				****
		Chlorella	light 120	8.12667e+06					****

## Sheet: Figure S5
		Statistical analysis of significance test using Factorial ANOVA according to post-hoc Tukey HSD Test for data shown in Figure S5
		Tukey HSD test; variable EMission rate_cell no Approximate Probabilities for Post Hoc Tests Error: Between MSE = 0.0000, df = 90.000 *Red indicates significant (p<0.05) differences
		Species	Light level	Compound	Synechococcus	Synechococcus	Synechococcus	Synechococcus	Synechococcus	Synechococcus	Synechococcus	Synechococcus	Synechococcus	Synechococcus	Synechococcus	Synechococcus	Synechococcus	Synechococcus	Synechococcus	Chlorella	Chlorella	Chlorella	Chlorella	Chlorella	Chlorella	Chlorella	Chlorella	Chlorella	Chlorella	Chlorella	Chlorella	Chlorella	Chlorella	Chlorella	Amphora	Amphora	Amphora	Amphora	Amphora	Amphora	Amphora	Amphora	Amphora	Amphora	Amphora	Amphora	Amphora	Amphora	Amphora
					Light 0	Light 0	Light 0	Light 0	Light 0	Light 40	Light 40	Light 40	Light 40	Light 40	Light 120	Light 120	Light 120	Light 120	Light 120	Light 0	Light 0	Light 0	Light 0	Light 0	Light 40	Light 40	Light 40	Light 40	Light 40	Light 120	Light 120	Light 120	Light 120	Light 120	Light 0	Light 0	Light 0	Light 0	Light 0	Light 40	Light 40	Light 40	Light 40	Light 40	Light 120	Light 120	Light 120	Light 120	Light 120
					CHBr3	CH3I	CHCl3	CHBr2Cl	CH2Br2	CHBr3	CH3I	CHCl3	CHBr2Cl	CH2Br2	CHBr3	CH3I	CHCl3	CHBr2Cl	CH2Br2	CHBr3	CH3I	CHCl3	CHBr2Cl	CH2Br2	CHBr3	CH3I	CHCl3	CHBr2Cl	CH2Br2	CHBr3	CH3I	CHCl3	CHBr2Cl	CH2Br2	CHBr3	CH3I	CHCl3	CHBr2Cl	CH2Br2	CHBr3	CH3I	CHCl3	CHBr2Cl	CH2Br2	CHBr3	CH3I	CHCl3	CHBr2Cl	CH2Br2
		Synechococcus	Light 0	CHBr3		0.999713	1	1	1	0.999468	0.680913	0.000160399	1	0.999998	1	0.994535	1	1	1	1	0.937587	1	1	1	0.00266273	1	0.0461821	1	0.999766	1	1	1	1	1	1	0.000160397	0.0189013	1	1	0.67914	1	0.00305857	1	0.999529	0.613642	0.000160397	1	1	1
		Synechococcus	Light 0	CH3I	0.999713		0.999909	0.999817	1	0.212881	1	0.000184504	0.999867	0.443667	0.999713	1	0.99999	0.999835	1	0.99975	1	0.999979	0.999837	0.999665	0.000161186	0.817918	0.000211912	0.999708	0.248011	0.999792	0.998678	0.999698	0.999807	0.999949	0.999843	0.000160397	0.832017	0.999973	1	0.00869575	0.99608	0.000161362	0.999861	0.218077	0.00644247	0.000160397	0.994723	0.999908	1
		Synechococcus	Light 0	CHCl3	1	0.999909		1	1	0.998609	0.743786	0.0001604	1	0.99999	1	0.997491	1	1	1	1	0.960441	1	1	1	0.00194722	1	0.0352752	1	0.999339	1	1	1	1	1	1	0.000160397	0.0251307	1	1	0.61265	1	0.00223556	1	0.998752	0.545799	0.000160397	1	1	1
		Synechococcus	Light 0	CHBr2Cl	1	0.999817	1		1	0.999201	0.70693	0.000160399	1	0.999996	1	0.995959	1	1	1	1	0.947744	1	1	1	0.00234701	1	0.0414272	1	0.999639	1	1	1	1	1	1	0.000160397	0.0212293	1	1	0.652503	1	0.0026904	1	0.999295	0.586203	0.000160397	1	1	1
		Synechococcus	Light 0	CH2Br2	1	1	1	1		0.875809	0.990038	0.000160547	1	0.981372	1	1	1	1	1	1	0.99993	1	1	1	0.000260553	0.999869	0.00349206	1	0.905913	1	1	1	1	1	1	0.000160397	0.174778	1	1	0.171399	1	0.000279362	1	0.88081	0.138363	0.000160397	1	1	1
		Synechococcus	Light 40	CHBr3	0.999468	0.212881	0.998609	0.999201	0.875809		0.00732059	0.000160397	0.99896	1	0.999468	0.104006	0.994709	0.99913	0.857155	0.999396	0.0347806	0.996431	0.999119	0.999541	0.463463	1	0.961427	0.999476	1	0.999288	0.999902	0.999493	0.999235	0.997901	0.999091	0.000160397	0.000170933	0.996891	0.795992	1	0.999982	0.492458	0.998997	1	1	0.000160397	0.99999	0.998621	0.773477
		Synechococcus	Light 40	CH3I	0.680913	1	0.743786	0.70693	0.990038	0.00732059		0.00324353	0.72454	0.0253972	0.680913	1	0.834339	0.712628	0.992538	0.689176	1	0.807709	0.713461	0.6714	0.000160398	0.114988	0.000160565	0.679861	0.00928062	0.699897	0.578147	0.677821	0.704067	0.771721	0.715536	0.000160397	0.999989	0.798315	0.996995	0.000248103	0.490447	0.000160399	0.722138	0.00759535	0.000219582	0.000160397	0.464205	0.743211	0.997847
		Synechococcus	Light 40	CHCl3	0.000160399	0.000184504	0.0001604	0.000160399	0.000160547	0.000160397	0.00324353		0.0001604	0.000160397	0.000160399	0.000251533	0.000160404	0.000160399	0.000160582	0.000160399	0.000630621	0.000160402	0.000160399	0.000160399	0.000160397	0.000160397	0.000160397	0.000160399	0.000160397	0.000160399	0.000160398	0.000160399	0.000160399	0.000160401	0.000160399	0.000160397	0.30811	0.000160402	0.000160727	0.000160397	0.000160397	0.000160397	0.0001604	0.000160397	0.000160397	0.000160397	0.000160397	0.0001604	0.000160795
		Synechococcus	Light 40	CHBr2Cl	1	0.999867	1	1	1	0.99896	0.72454	0.0001604		0.999994	1	0.99676	1	1	1	1	0.954051	1	1	1	0.00215112	1	0.0384093	1	0.999517	1	1	1	1	1	1	0.000160397	0.0229989	1	1	0.633786	1	0.00246495	1	0.999071	0.567133	0.000160397	1	1	1
		Synechococcus	Light 40	CH2Br2	0.999998	0.443667	0.99999	0.999996	0.981372	1	0.0253972	0.000160397	0.999994		0.999998	0.255855	0.999908	0.999995	0.976266	0.999997	0.102277	0.999952	0.999995	0.999998	0.225944	1	0.81113	0.999998	1	0.999996	1	0.999998	0.999996	0.99998	0.999995	0.000160397	0.000221114	0.999962	0.955849	0.999997	1	0.245971	0.999994	1	0.999988	0.000160397	1	0.99999	0.946888
		Synechococcus	Light 120	CHBr3	1	0.999713	1	1	1	0.999468	0.680913	0.000160399	1	0.999998		0.994535	1	1	1	1	0.937587	1	1	1	0.00266273	1	0.0461821	1	0.999766	1	1	1	1	1	1	0.000160397	0.0189013	1	1	0.67914	1	0.00305857	1	0.999529	0.613642	0.000160397	1	1	1
		Synechococcus	Light 120	CH3I	0.994535	1	0.997491	0.995959	1	0.104006	1	0.000251533	0.99676	0.255855	0.994535		0.999444	0.996237	1	0.995023	1	0.999072	0.996275	0.993929	0.000160566	0.616981	0.000173646	0.99447	0.1247	0.995606	0.984801	0.994343	0.995818	0.998324	0.996369	0.000160397	0.950246	0.998909	1	0.00314708	0.968601	0.000160605	0.99666	0.107073	0.00231058	0.000160397	0.961679	0.997472	1
		Synechococcus	Light 120	CHCl3	1	0.99999	1	1	1	0.994709	0.834339	0.000160404	1	0.999908	1	0.999444		1	1	1	0.983671	1	1	1	0.00116763	1	0.0223339	1	0.997103	1	1	1	1	1	1	0.000160397	0.0394911	1	1	0.501538	1	0.00133411	1	0.99516	0.43653	0.000160397	1	1	1
		Synechococcus	Light 120	CHBr2Cl	1	0.999835	1	1	1	0.99913	0.712628	0.000160399	1	0.999995	1	0.996237	1		1	1	0.949836	1	1	1	0.00228213	1	0.0404386	1	0.999603	1	1	1	1	1	1	0.000160397	0.0217858	1	1	0.646511	1	0.00261576	1	0.999225	0.580079	0.000160397	1	1	1
		Synechococcus	Light 120	CH2Br2	1	1	1	1	1	0.857155	0.992538	0.000160582	1	0.976266	1	1	1	1		1	0.999959	1	1	1	0.000244963	0.999787	0.00305616	1	0.890085	1	1	1	1	1	1	0.000160397	0.191097	1	1	0.156381	1	0.000260962	1	0.862588	0.125677	0.000160397	1	1	1
		Chlorella	Light 0	CHBr3	1	0.99975	1	1	1	0.999396	0.689176	0.000160399	1	0.999997	1	0.995023	1	1	1		0.940923	1	1	1	0.00255888	1	0.0446505	1	0.999731	1	1	1	1	1	1	0.000160397	0.0196091	1	1	0.67081	1	0.0029395	1	0.999464	0.605019	0.000160397	1	1	1
		Chlorella	Light 0	CH3I	0.937587	1	0.960441	0.947744	0.99993	0.0347806	1	0.000630621	0.954051	0.102277	0.937587	1	0.983671	0.949836	0.999959	0.940923		0.977956	0.950138	0.933616	0.000160417	0.338561	0.000162429	0.937155	0.0429528	0.945099	0.886884	0.936312	0.946676	0.968776	0.950884	0.000160397	0.996289	0.975724	0.999993	0.000833464	0.828593	0.000160422	0.953218	0.0359457	0.000627391	0.000160397	0.808076	0.960258	0.999996
		Chlorella	Light 0	CHCl3	1	0.999979	1	1	1	0.996431	0.807709	0.000160402	1	0.999952	1	0.999072	1	1	1	1	0.977956		1	1	0.00136767	1	0.0258616	1	0.998125	1	1	1	1	1	1	0.000160397	0.0343007	1	1	0.53654	1	0.00156551	1	0.996757	0.47057	0.000160397	1	1	1
		Chlorella	Light 0	CHBr2Cl	1	0.999837	1	1	1	0.999119	0.713461	0.000160399	1	0.999995	1	0.996275	1	1	1	1	0.950138	1		1	0.00227276	1	0.0402952	1	0.999598	1	1	1	1	1	1	0.000160397	0.021868	1	1	0.645629	1	0.00260497	1	0.999215	0.579179	0.000160397	1	1	1
		Chlorella	Light 0	CH2Br2	1	0.999665	1	1	1	0.999541	0.6714	0.000160399	1	0.999998	1	0.993929	1	1	1	1	0.933616	1	1		0.00278673	1	0.0479901	1	0.999801	1	1	1	1	1	1	0.000160397	0.0181235	1	1	0.688596	1	0.00320069	1	0.999595	0.623469	0.000160397	1	1	1
		Chlorella	Light 40	CHBr3	0.00266273	0.000161186	0.00194722	0.00234701	0.000260553	0.463463	0.000160398	0.000160397	0.00215112	0.225944	0.00266273	0.000160566	0.00116763	0.00228213	0.000244963	0.00255888	0.000160417	0.00136767	0.00227276	0.00278673		0.059361	1	0.0026762	0.412906	0.00242916	0.00430624	0.0027025	0.00238017	0.00167123	0.00224958	0.000160397	0.000160397	0.00144299	0.000212311	0.992049	0.0064637	1	0.00217705	0.455343	0.996112	0.000160397	0.00729542	0.00195297	0.000204516
		Chlorella	Light 40	CH3I	1	0.817918	1	1	0.999869	1	0.114988	0.000160397	1	1	1	0.616981	1	1	0.999787	1	0.338561	1	1	1	0.059361		0.435302	1	1	1	1	1	1	1	1	0.000160397	0.000738714	1	0.999247	0.997348	1	0.0663595	1	1	0.994335	0.000160397	1	1	0.998893
		Chlorella	Light 40	CHCl3	0.0461821	0.000211912	0.0352752	0.0414272	0.00349206	0.961427	0.000160565	0.000160397	0.0384093	0.81113	0.0461821	0.000173646	0.0223339	0.0404386	0.00305616	0.0446505	0.000162429	0.0258616	0.0402952	0.0479901	1	0.435302		0.0463796	0.94449	0.0426688	0.0686182	0.0467644	0.0419297	0.0309811	0.0399397	0.000160397	0.000160397	0.0271553	0.00208753	1	0.0943583	1	0.0388117	0.959095	1	0.000160397	0.103677	0.0353666	0.00182864
		Chlorella	Light 40	CHBr2Cl	1	0.999708	1	1	1	0.999476	0.679861	0.000160399	1	0.999998	1	0.99447	1	1	1	1	0.937155	1	1	1	0.0026762	1	0.0463796		0.999771	1	1	1	1	1	1	0.000160397	0.0188136	1	1	0.680192	1	0.00307401	1	0.999537	0.614733	0.000160397	1	1	1
		Chlorella	Light 40	CH2Br2	0.999766	0.248011	0.999339	0.999639	0.905913	1	0.00928062	0.000160397	0.999517	1	0.999766	0.1247	0.997103	0.999603	0.890085	0.999731	0.0429528	0.998125	0.999598	0.999801	0.412906	1	0.94449	0.999771		0.999679	0.999964	0.999778	0.999656	0.998956	0.999584	0.000160397	0.000175085	0.998391	0.836588	1	0.999994	0.44087	0.999536	1	1	0.000160397	0.999997	0.999345	0.816342
		Chlorella	Light 120	CHBr3	1	0.999792	1	1	1	0.999288	0.699897	0.000160399	1	0.999996	1	0.995606	1	1	1	1	0.945099	1	1	1	0.00242916	1	0.0426688	1	0.999679		1	1	1	1	1	0.000160397	0.0205696	1	1	0.659827	1	0.00278488	1	0.999367	0.593706	0.000160397	1	1	1
		Chlorella	Light 120	CH3I	1	0.998678	1	1	1	0.999902	0.578147	0.000160398	1	1	1	0.984801	1	1	1	1	0.886884	1	1	1	0.00430624	1	0.0686182	1	0.999964	1		1	1	1	1	0.000160397	0.012065	1	1	0.773796	1	0.00493758	1	0.999915	0.714417	0.000160397	1	1	1
		Chlorella	Light 120	CHCl3	1	0.999698	1	1	1	0.999493	0.677821	0.000160399	1	0.999998	1	0.994343	1	1	1	1	0.936312	1	1	1	0.0027025	1	0.0467644	1	0.999778	1	1		1	1	1	0.000160397	0.0186446	1	1	0.682228	1	0.00310416	1	0.999552	0.616847	0.000160397	1	1	1
		Chlorella	Light 120	CHBr2Cl	1	0.999807	1	1	1	0.999235	0.704067	0.000160399	1	0.999996	1	0.995818	1	1	1	1	0.946676	1	1	1	0.00238017	1	0.0419297	1	0.999656	1	1	1		1	1	0.000160397	0.0209578	1	1	0.655492	1	0.00272854	1	0.999326	0.589265	0.000160397	1	1	1
		Chlorella	Light 120	CH2Br2	1	0.999949	1	1	1	0.997901	0.771721	0.000160401	1	0.99998	1	0.998324	1	1	1	1	0.968776	1	1	1	0.00167123	1	0.0309811	1	0.998956	1	1	1	1		1	0.000160397	0.028685	1	1	0.580598	1	0.00192636	1	0.998105	0.513817	0.000160397	1	1	1
		Amphora	Light 0	CHBr3	1	0.999843	1	1	1	0.999091	0.715536	0.000160399	1	0.999995	1	0.996369	1	1	1	1	0.950884	1	1	1	0.00224958	1	0.0399397	1	0.999584	1	1	1	1	1		0.000160397	0.0220742	1	1	0.643429	1	0.00257829	1	0.99919	0.576936	0.000160397	1	1	1
		Amphora	Light 0	CH3I	0.000160397	0.000160397	0.000160397	0.000160397	0.000160397	0.000160397	0.000160397	0.000160397	0.000160397	0.000160397	0.000160397	0.000160397	0.000160397	0.000160397	0.000160397	0.000160397	0.000160397	0.000160397	0.000160397	0.000160397	0.000160397	0.000160397	0.000160397	0.000160397	0.000160397	0.000160397	0.000160397	0.000160397	0.000160397	0.000160397	0.000160397		0.000160397	0.000160397	0.000160397	0.000160397	0.000160397	0.000160397	0.000160397	0.000160397	0.000160397	0.000160397	0.000160397	0.000160397	0.000160397
		Amphora	Light 0	CHCl3	0.0189013	0.832017	0.0251307	0.0212293	0.174778	0.000170933	0.999989	0.30811	0.0229989	0.000221114	0.0189013	0.950246	0.0394911	0.0217858	0.191097	0.0196091	0.996289	0.0343007	0.021868	0.0181235	0.000160397	0.000738714	0.000160397	0.0188136	0.000175085	0.0205696	0.012065	0.0186446	0.0209578	0.028685	0.0220742	0.000160397		0.0327016	0.243648	0.000160431	0.00815299	0.000160397	0.0227484	0.000171492	0.000160418	0.000160397	0.00722458	0.0250635	0.262891
		Amphora	Light 0	CHBr2Cl	1	0.999973	1	1	1	0.996891	0.798315	0.000160402	1	0.999962	1	0.998909	1	1	1	1	0.975724	1	1	1	0.00144299	1	0.0271553	1	0.998391	1	1	1	1	1	1	0.000160397	0.0327016		1	0.548367	1	0.00165255	1	0.997178	0.482101	0.000160397	1	1	1
		Amphora	Light 0	CH2Br2	1	1	1	1	1	0.795992	0.996995	0.000160727	1	0.955849	1	1	1	1	1	1	0.999993	1	1	1	0.000212311	0.999247	0.00208753	1	0.836588	1	1	1	1	1	1	0.000160397	0.243648	1		0.119167	1	0.000222335	1	0.802569	0.094546	0.000160397	1	1	1
		Amphora	Light 40	CHBr3	0.67914	0.00869575	0.61265	0.652503	0.171399	1	0.000248103	0.000160397	0.633786	0.999997	0.67914	0.00314708	0.501538	0.646511	0.156381	0.67081	0.000833464	0.53654	0.645629	0.688596	0.992049	0.997348	1	0.680192	1	0.659827	0.773796	0.682228	0.655492	0.580598	0.643429	0.000160397	0.000160431	0.548367	0.119167		0.842407	0.994161	0.636374	1	1	0.000160397	0.860787	0.613295	0.108607
		Amphora	Light 40	CH3I	1	0.99608	1	1	1	0.999982	0.490447	0.000160397	1	1	1	0.968601	1	1	1	1	0.828593	1	1	1	0.0064637	1	0.0943583	1	0.999994	1	1	1	1	1	1	0.000160397	0.00815299	1	1	0.842407		0.00738808	1	0.999985	0.791426	0.000160397	1	1	1
		Amphora	Light 40	CHCl3	0.00305857	0.000161362	0.00223556	0.0026904	0.000279362	0.492458	0.000160399	0.000160397	0.00246495	0.245971	0.00305857	0.000160605	0.00133411	0.00261576	0.000260962	0.0029395	0.000160422	0.00156551	0.00260497	0.00320069	1	0.0663595	1	0.00307401	0.44087	0.00278488	0.00493758	0.00310416	0.00272854	0.00192636	0.00257829	0.000160397	0.000160397	0.00165255	0.000222335	0.994161	0.00738808		0.00249481	0.484396	0.997256	0.000160397	0.00833653	0.00224217	0.000213091
		Amphora	Light 40	CHBr2Cl	1	0.999861	1	1	1	0.998997	0.722138	0.0001604	1	0.999994	1	0.99666	1	1	1	1	0.953218	1	1	1	0.00217705	1	0.0388117	1	0.999536	1	1	1	1	1	1	0.000160397	0.0227484	1	1	0.636374	1	0.00249481		0.999104	0.56976	0.000160397	1	1	1
		Amphora	Light 40	CH2Br2	0.999529	0.218077	0.998752	0.999295	0.88081	1	0.00759535	0.000160397	0.999071	1	0.999529	0.107073	0.99516	0.999225	0.862588	0.999464	0.0359457	0.996757	0.999215	0.999595	0.455343	1	0.959095	0.999537	1	0.999367	0.999915	0.999552	0.999326	0.998105	0.99919	0.000160397	0.000171492	0.997178	0.802569	1	0.999985	0.484396	0.999104		1	0.000160397	0.999991	0.998763	0.780384
		Amphora	Light 120	CHBr3	0.613642	0.00644247	0.545799	0.586203	0.138363	1	0.000219582	0.000160397	0.567133	0.999988	0.613642	0.00231058	0.43653	0.580079	0.125677	0.605019	0.000627391	0.47057	0.579179	0.623469	0.996112	0.994335	1	0.614733	1	0.593706	0.714417	0.616847	0.589265	0.513817	0.576936	0.000160397	0.000160418	0.482101	0.094546	1	0.791426	0.997256	0.56976	1		0.000160397	0.812842	0.546444	0.0858281
		Amphora	Light 120	CH3I	0.000160397	0.000160397	0.000160397	0.000160397	0.000160397	0.000160397	0.000160397	0.000160397	0.000160397	0.000160397	0.000160397	0.000160397	0.000160397	0.000160397	0.000160397	0.000160397	0.000160397	0.000160397	0.000160397	0.000160397	0.000160397	0.000160397	0.000160397	0.000160397	0.000160397	0.000160397	0.000160397	0.000160397	0.000160397	0.000160397	0.000160397	0.000160397	0.000160397	0.000160397	0.000160397	0.000160397	0.000160397	0.000160397	0.000160397	0.000160397	0.000160397		0.000160397	0.000160397	0.000160397
		Amphora	Light 120	CHCl3	1	0.994723	1	1	1	0.99999	0.464205	0.000160397	1	1	1	0.961679	1	1	1	1	0.808076	1	1	1	0.00729542	1	0.103677	1	0.999997	1	1	1	1	1	1	0.000160397	0.00722458	1	1	0.860787	1	0.00833653	1	0.999991	0.812842	0.000160397		1	1
		Amphora	Light 120	CHBr2Cl	1	0.999908	1	1	1	0.998621	0.743211	0.0001604	1	0.99999	1	0.997472	1	1	1	1	0.960258	1	1	1	0.00195297	1	0.0353666	1	0.999345	1	1	1	1	1	1	0.000160397	0.0250635	1	1	0.613295	1	0.00224217	1	0.998763	0.546444	0.000160397	1		1
		Amphora	Light 120	CH2Br2	1	1	1	1	1	0.773477	0.997847	0.000160795	1	0.946888	1	1	1	1	1	1	0.999996	1	1	1	0.000204516	0.998893	0.00182864	1	0.816342	1	1	1	1	1	1	0.000160397	0.262891	1	1	0.108607	1	0.000213091	1	0.780384	0.0858281	0.000160397	1	1
